# Supplementary material
Source: publisher figshare collection journal article supplement (https://acs.figshare.com/ndownloader/files/4107187)
Supplement: Supplementary file 1 [file 4107187]

## Supporting information

# Design and Synthesis of Luminescent Cyclometalated Iridium(III) Complex Having *N,N*-Diethylamino Group that Stains Acidic Intracellular Organelles and Induces Cell Death by Photoirradiation

*Shinsuke Moromizato,<sup>†</sup> Yosuke Hisamatsu,<sup>†,‡</sup> Toshihiro Suzuki,<sup>‡,§</sup> Yasuki Matsuo,<sup>†</sup> Ryo Abe,<sup>‡,§</sup>*

*and Shin Aoki<sup>\*†,‡</sup>*

Faculty of Pharmaceutical Sciences, Tokyo University of Science,

2641 Yamazaki, Noda, Chiba, 278-8510 Japan,

Center for Technologies against Cancer (CTC), Tokyo University of Science,

2641 Yamazaki, Noda, Chiba, 278-8510 Japan,

Research Institute for Biomedical Sciences, Tokyo University of Science

2641 Yamazaki, Noda, Chiba, 278-8510 Japan,

\*To whom correspondence should be addressed. E-mail: shinaoki@rs.noda.tus.ac.jp

**RECEIVED DATE (to be automatically inserted after your manuscript is accepted if required  
according to the journal that you are submitting your paper to)**

†Faculty of Pharmaceutical Sciences, Tokyo University of Science

‡Center for Technologies against Cancer (CTC), Tokyo University of Science

§Research Institute for Biomedical Science, Tokyo University of Science

**Table S1.**  $pK_a$  values of model compounds

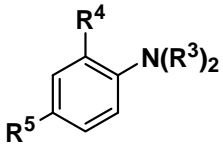

Model compound

|                                          |                                             | <b>6a, 7a, 8a</b><br>( $R^3 = H$ )                         | <b>6b, 7b, 8b</b><br>( $R^3 = Me$ )                        | <b>6c, 7c, 8c</b><br>( $R^3 = Et$ )                        | <b>6d, 7d, 8d</b><br>( $R^3 = n\text{-Pr}$ )                       | <b>6e, 7e, 8e</b><br>( $R^3 = n\text{-Bu}$ )                        |
|------------------------------------------|---------------------------------------------|------------------------------------------------------------|------------------------------------------------------------|------------------------------------------------------------|--------------------------------------------------------------------|---------------------------------------------------------------------|
| <b>6a-e</b><br>( $R^4 = R^5 = H$ )       | $pK_a$                                      | 4.5 <sup>a</sup><br>(4.6) <sup>b</sup><br>4.6 <sup>c</sup> | 4.9 <sup>a</sup><br>(5.1) <sup>b</sup><br>5.1 <sup>c</sup> | 6.5 <sup>a</sup><br>(6.7) <sup>b</sup><br>6.6 <sup>c</sup> | <i>n.d.</i> <sup>e</sup><br>(5.7) <sup>b</sup><br>5.6 <sup>c</sup> | <i>n.d.</i> <sup>e</sup><br>(6.3) <sup>b</sup><br>~5.7 <sup>c</sup> |
|                                          | $\Delta pK_a^d$                             | 0                                                          | + 0.4                                                      | + 2.0                                                      | -                                                                  | -                                                                   |
|                                          | <hr style="border-top: 1px dashed black;"/> |                                                            |                                                            |                                                            |                                                                    |                                                                     |
| <b>7a-e</b><br>( $R^4 = Me, R^5 = H$ )   | $pK_a$                                      | 4.3 <sup>a</sup><br>(4.5) <sup>b</sup><br>4.4 <sup>c</sup> | -<br>(5.7) <sup>b</sup><br>5.9 <sup>c</sup>                | 7.2 <sup>a</sup><br>(7.2) <sup>b</sup><br>7.2 <sup>c</sup> | <i>n.d.</i> <sup>e</sup><br>(6.2) <sup>b</sup><br>-                | <i>n.d.</i> <sup>e</sup><br>(6.8) <sup>b</sup><br>-                 |
|                                          | $\Delta pK_a^d$                             | 0                                                          | -                                                          | + 2.9                                                      | -                                                                  | -                                                                   |
|                                          | <hr style="border-top: 1px dashed black;"/> |                                                            |                                                            |                                                            |                                                                    |                                                                     |
| <b>8a-e</b><br>( $R^4 = Me, R^5 = OMe$ ) | $pK_a$                                      | 5.4 <sup>a</sup><br>(5.1) <sup>b</sup>                     | (6.4) <sup>b</sup>                                         | 7.6 <sup>a</sup><br>(7.9) <sup>b</sup>                     | <i>n.d.</i> <sup>e</sup><br>-                                      | <i>n.d.</i> <sup>e</sup><br>-                                       |
|                                          | $\Delta pK_a^d$                             | 0                                                          |                                                            | + 2.2                                                      | -                                                                  | -                                                                   |
|                                          | <hr/>                                       |                                                            |                                                            |                                                            |                                                                    |                                                                     |

<sup>a)</sup> The  $pK_a$  values determined by potentiometric pH titration in MeCN/H<sub>2</sub>O(5/95) with  $I = 0.1$  (NaNO<sub>3</sub>) at 25 °C. <sup>b)</sup>  $pK_a$  values in parentheses were cited from the SciFinder database. <sup>c)</sup> Brown, H. C.; McDaniel, D. H.; Häflinger, O. In *Determination of Organic Structures by Physical Methods*; Braude, E. A., Nachod, F. C., Eds.; Academic Press: New York, 1955. <sup>d)</sup>  $\Delta pK_a = (pK_a \text{ value of } N,N\text{-alkylaniline derivative}) - (pK_a \text{ value of the corresponding anilines})$  based on the  $pK_a$  values determined by potentiometric pH titrations. <sup>e)</sup> Not determined due to the low solubility of the compounds in aqueous solution.

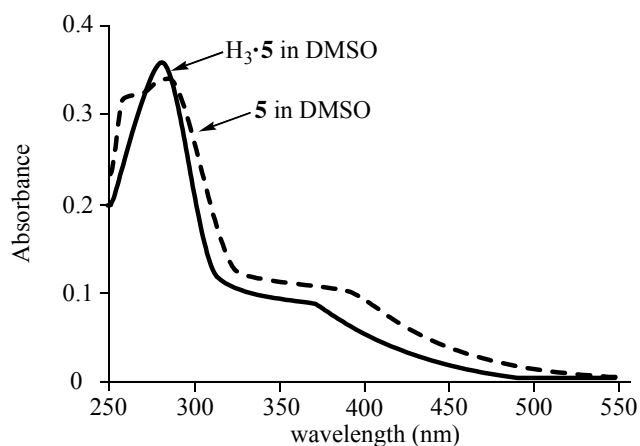

**Figure S1.** UV/vis spectra of **5** (10  $\mu$ M) in DMSO and  $H_3 \cdot 5$  (10  $\mu$ M) in DMSO.

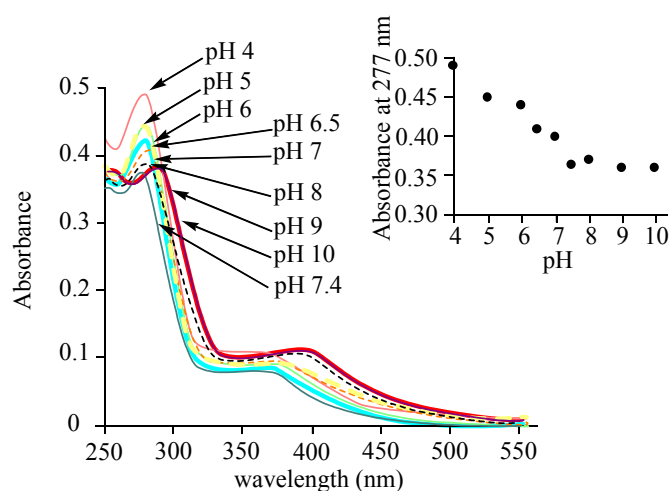

**Figure S2.** pH-Dependent change in UV/vis spectra of **5** (10  $\mu$ M) in DMSO/10 mM buffer (from pH 4 to 10) (1/1) at 25  $^{\circ}$ C. pH 4 (pink plain curve), pH 5 (green thin curve), pH 6 (yellow bold dashed curve), pH 6.5 (blue bold curve), pH 7 (orange dashed curve), pH 7.4 (gray thin curve), pH 8 (black plain dashed curve), pH 9 (purple plain curve) and pH 10 (red bold curve). (Inset) pH-dependent change (from pH 4 to pH 10) in the absorbance of **5** at 277 nm.

**Table S2.** Photochemical properties of **5** in DMSO at 298K.

| Complex                       | $\lambda_{\text{max}}$ (absorption) <sup>a</sup> | $\lambda_{\text{max}}$ (emission) <sup>b</sup> | $\phi^{a,c}$         | $t^{1/2}$           |
|-------------------------------|--------------------------------------------------|------------------------------------------------|----------------------|---------------------|
| <b>5</b>                      | 260 nm, 283 nm, 385 nm                           | 554 nm                                         | $9.8 \times 10^{-3}$ | 2.9 $\mu\text{sec}$ |
| $\text{H}_3 \cdot \mathbf{5}$ | 282 nm, 375 nm                                   | 497 nm                                         | 0.29                 | 1.5 $\mu\text{sec}$ |

<sup>a</sup>)  $[\mathbf{5}] = [\text{H}_3 \cdot \mathbf{5}] = 10 \mu\text{M}$ , <sup>b</sup>)  $[\mathbf{5}] = [\text{H}_3 \cdot \mathbf{5}] = 1 \mu\text{M}$ , <sup>c</sup>) quantum yield of emission.

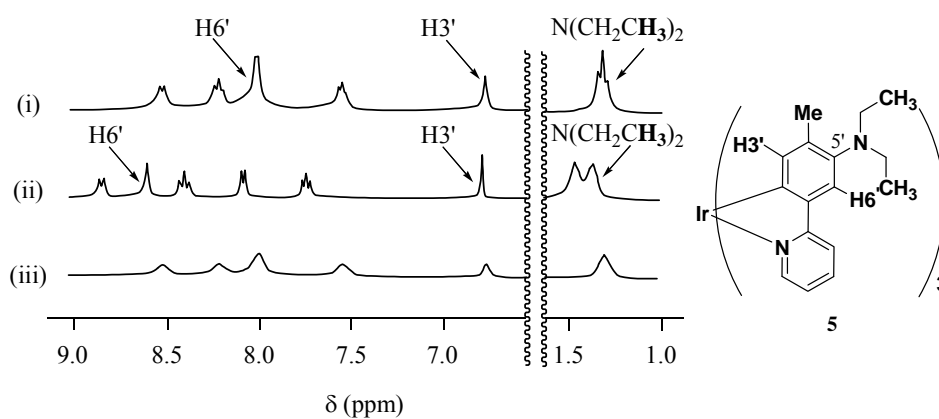

**Figure S3.** Change in  $^1\text{H}$  NMR of **5** (4 mM) in  $\text{DMSO-}d_6/\text{D}_2\text{O}$  (9/1) (300 MHz/TSP) upon the addition of acid (1N DCl in  $\text{DMSO-}d_6/\text{D}_2\text{O}$ (9/1)) and base (1N NaOD in  $\text{DMSO-}d_6/\text{D}_2\text{O}$ (9/1)). (i) acid-free **5**, (ii) (i) + DCl, (iii) (ii) + NaOD. TSP: sodium salt of 3-(trimethylsilyl)propionic-2,2,3,3- $d_4$  acid.

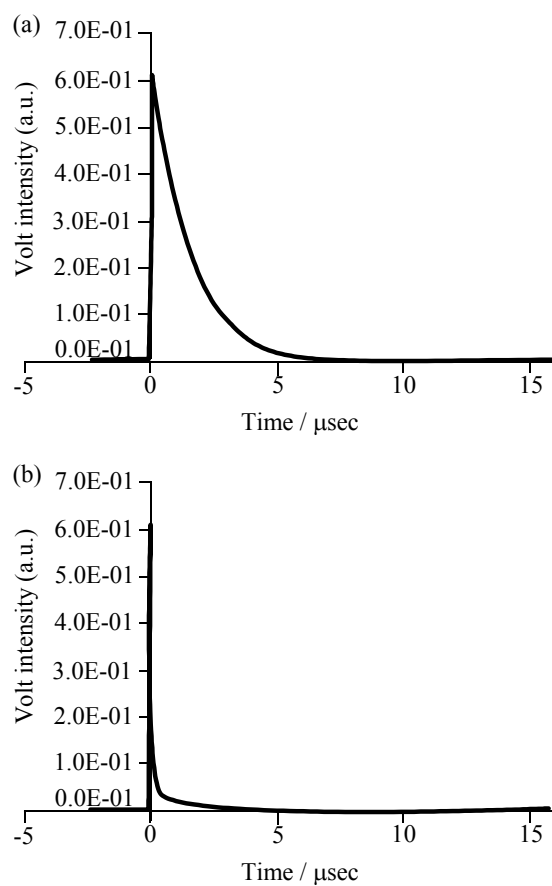

**Figure S4.** Luminescence decay of (a) **5** (5  $\mu\text{M}$ ) (in degassed DMSO/100 mM MES (pH 6.0) (1/4)) and (b) **5** (5  $\mu\text{M}$ ) (in degassed DMSO/100 mM HEPES (pH 7.4) (1/4)) at 25  $^{\circ}\text{C}$  (excitation at 355 nm). A.u. is arbitrary unit.

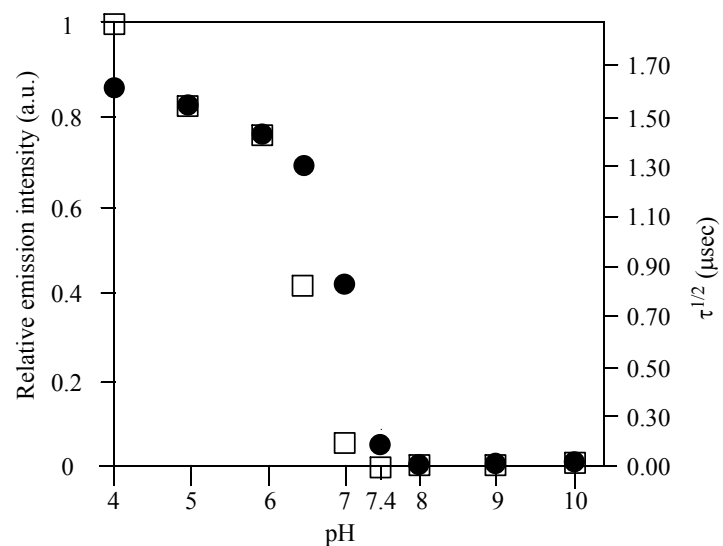

**Figure S5.** Comparison of pH-dependent change in emission intensity of **5** (1  $\mu$ M) (open squares) (excitation at 366 nm and emission at 494 nm) and pH-dependent change in lifetime of **5** (5  $\mu$ M) (closed circles). Luminescence decay of **5** (pH 6) and **5** (pH 7.4) are shown in Figure S4.

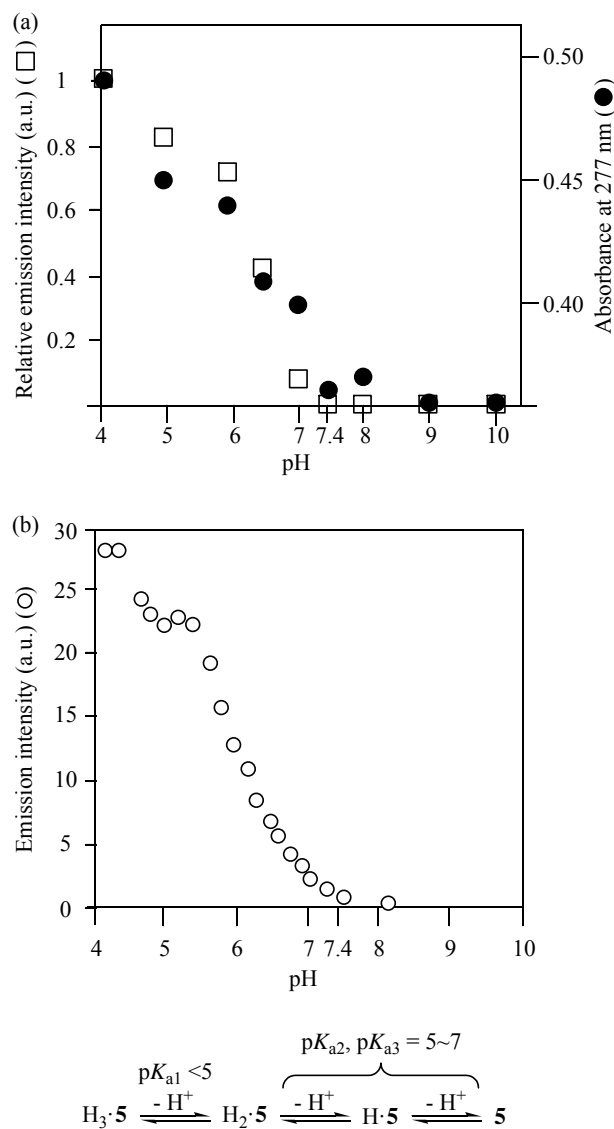

**Figure S6.** (a) Comparison of pH-dependent change in absorbance of **5** (10  $\mu$ M) at 277 nm (closed circles) and that in emission intensity of **5** (1  $\mu$ M) (open squares) (excitation at 366 nm and emission at 494 nm). (b) pH-dependent change in emission intensity of **5** (1  $\mu$ M) in DMSO/100  $\mu$ M MES buffer (1/4) at 25  $^{\circ}$ C. The pH value of a mixture was adjusted to pH 8 at the start point and changed from pH 8 to 4 by addition of 10 mM HCl aq. (10  $\mu$ L each, which is 0.125 eq. against MES molecule in a solution). The relative emission intensity of **5** in Figure S6a was calculated based on 1 at pH 4.



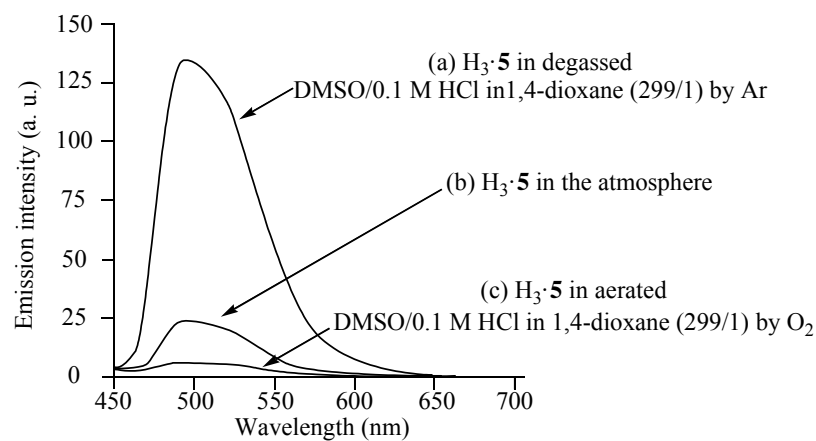

**Figure S7.** Emission spectra of  $\text{H}_3\cdot\mathbf{5}$  ( $1\ \mu\text{M}$ ) in DMSO/0.1 M HCl in 1,4-dioxane (299/1, v/v) (a) in degassed DMSO/0.1 M HCl in 1,4-dioxane (299/1, v/v) by Ar, (b) in the atmosphere, (c) in the aerated DMSO/0.1 M HCl in 1,4-dioxane (299/1, v/v) by  $^1\text{O}_2$  at  $25\ ^\circ\text{C}$ . Excitation at 366 nm. A.u. is in arbitrary units.

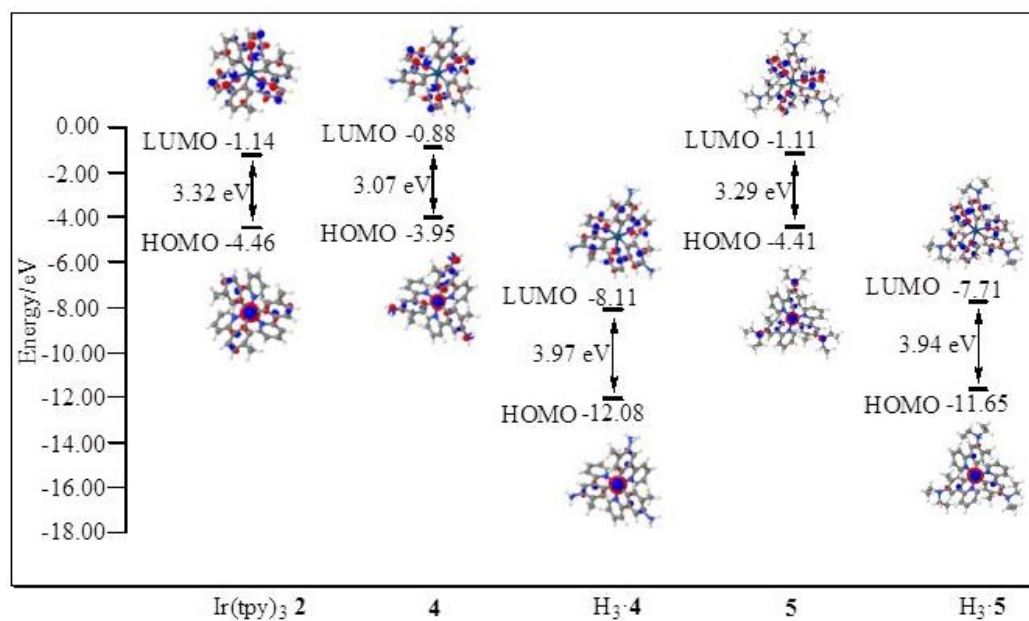

**Figure S8.** The HOMO–LUMO energy gap of **2**, **4**,  $\text{H}_3\cdot$ **4**, **5**, and  $\text{H}_3\cdot$ **5** calculated by the Gaussian03 program using the B3LYP hybrid functional together with the LanL2DZ basis set for Ir atom and the 6-31G basis set for H, C, N atoms.

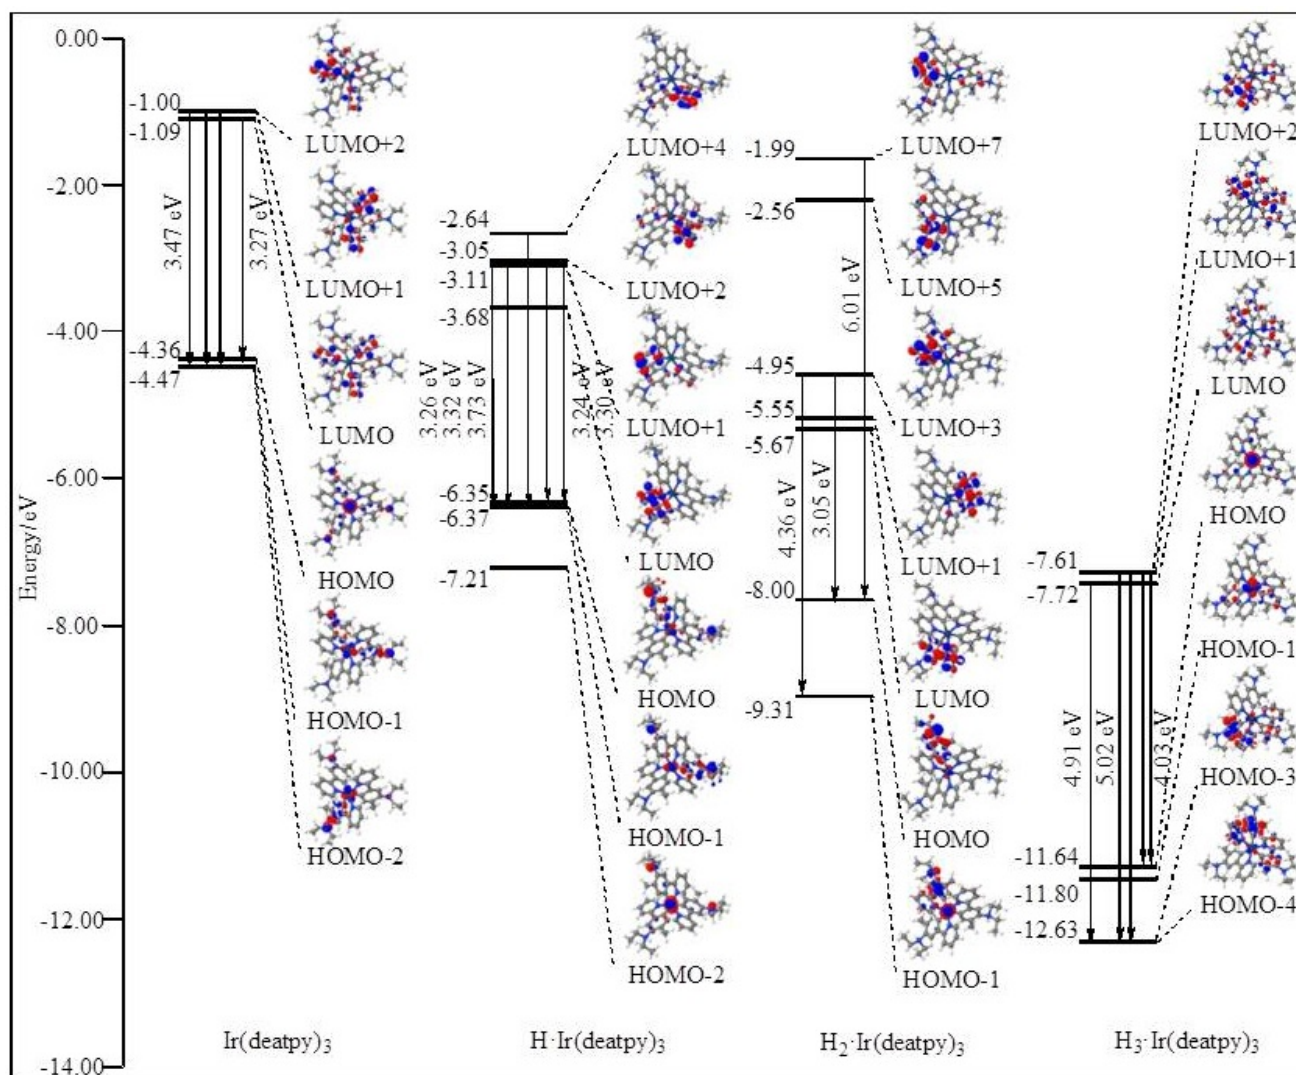

**Figure S9.** TD-DFT calculation of **5**, **H-5**, **H<sub>2</sub>-5**, and **H<sub>3</sub>-5** calculated by the Gaussian03 program using the B3LYP hybrid functional together with the LanL2DZ basis set for Ir atom and the 6-31G basis set for H, C, N atoms.

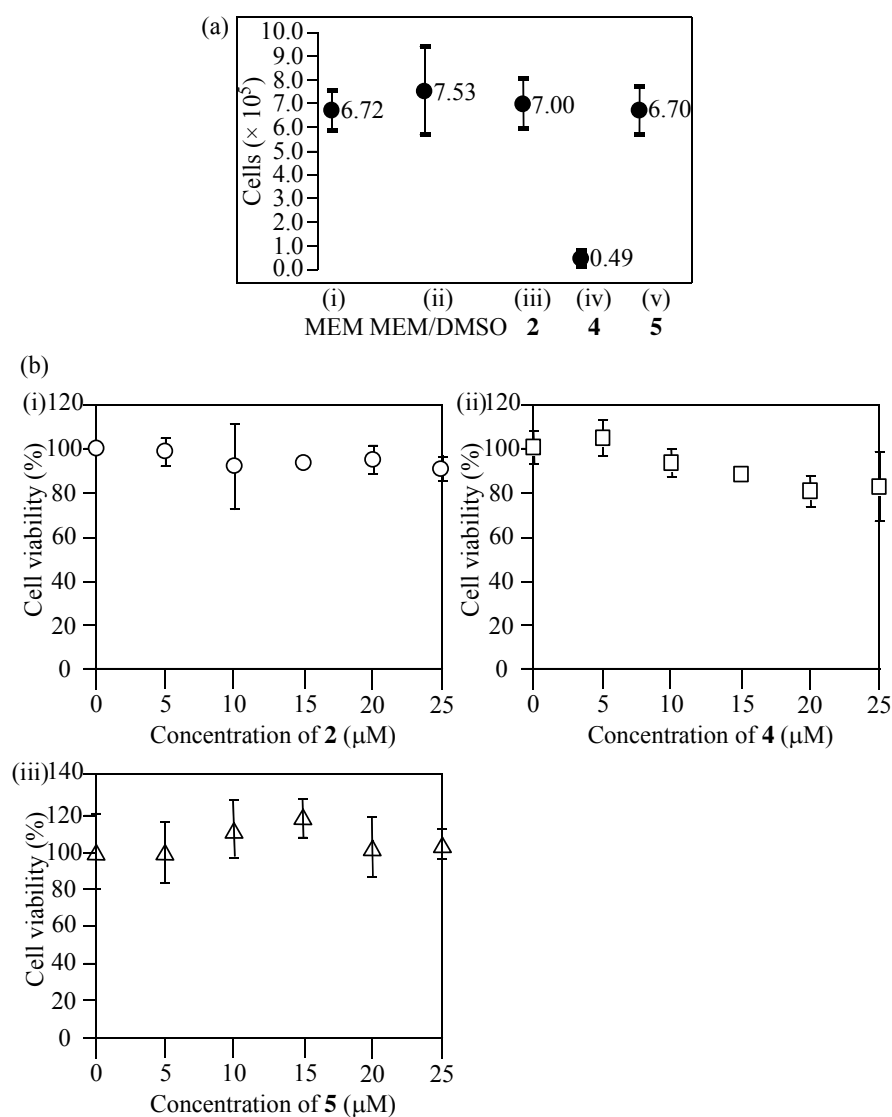

**Figure S10.** (a) HeLa-S3 cells growth in the absence and presence of Ir complexes (counted by trypan blue staining) at 37 °C for 4 days, (i) in MEM, (ii) in MEM/DMSO (99/1, v/v), (iii) with **2** in MEM/DMSO (99/1, v/v), (iv) with **4** in MEM/DMSO (99/1, v/v), and (v) **5** in MEM/DMSO (99/1, v/v) ([Ir complex] = 10  $\mu\text{M}$ ). (b) Results of MTT assay of HeLa-S3 cells in the presence of Ir complexes at 37 °C for 16 hours, with **2** (i), **4** (ii), and **5** (iii) in MEM/DMSO (99/1, v/v).

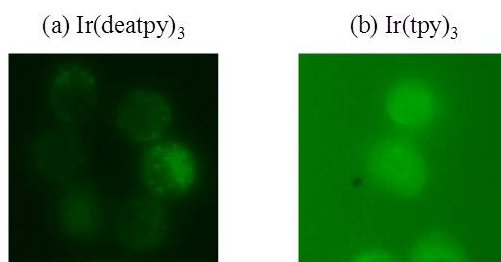

**Figure S11.** Fluorescence microscope images of HeLa-S3 cells ( $\times 40$ ) after incubation with (a) **5** and (b) **2** in MEM/DMSO (99/1, v/v) at 37 °C for 1 min without successive PBS wash ([Ir complex] = 10  $\mu$ M in medium, excitation at 377 nm).

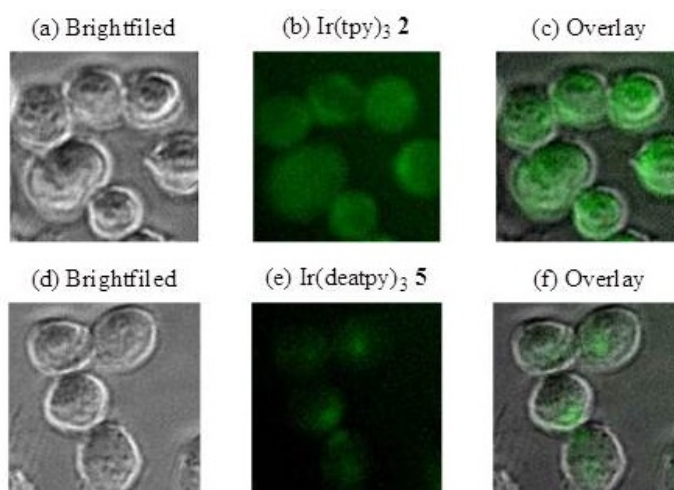

**Figure S12.** Luminescence microscopic images (BIOREVO BZ-9000, Keyence) of HeLa-S3 cells ( $\times 40$ ) incubated with **2** (10  $\mu$ M) and **5** (10  $\mu$ M) in MEM/DMSO (99/1, v/v) at 4 °C for 30 min respectively, excitation at 377 nm. (a) brightfield image of HeLa-S3 with **2**, (b) emission image of **2**, (c) overlay image of (a) + (b), (d) brightfield image of **5**, (e) emission image of **5**, (f) overlay image of (d) + (e).

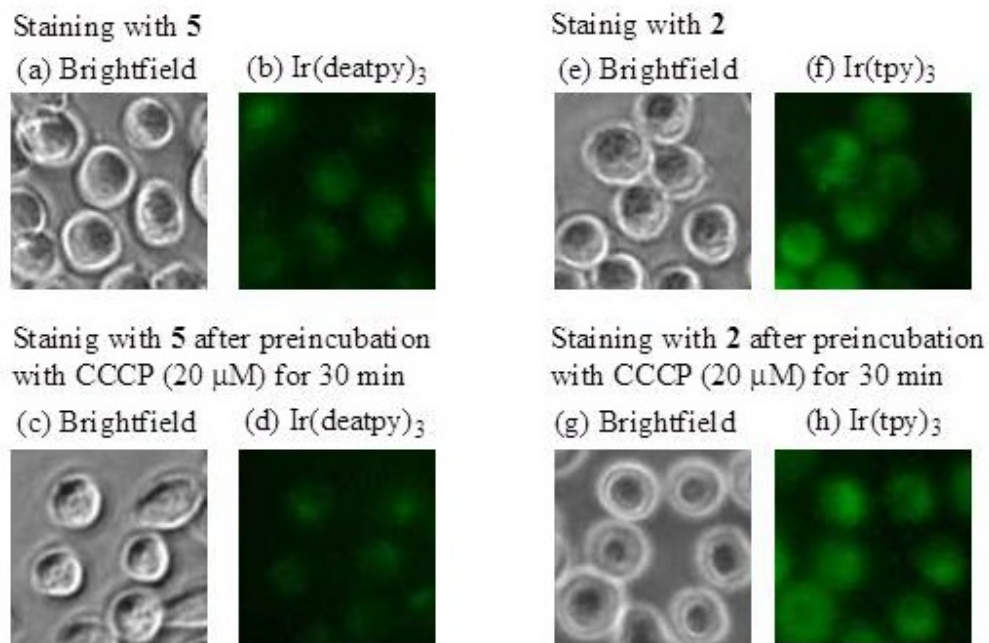

**Figure S13.** Fluorescence microscope images of HeLa-S3 cells ( $\times 40$ ) incubated with CCCP (20  $\mu\text{M}$ ) at 37  $^{\circ}\text{C}$  for 30 min, and then stained with **5** (10  $\mu\text{M}$ ) and **2** (10  $\mu\text{M}$ ) in MEM/DMSO (99/1, v/v) at 37  $^{\circ}\text{C}$  for 30 min, (excitation at 377 nm). (a), (c), (e), and (g) brightfield image of HeLa-S3, (b) emission image of **5**, (d) emission image of **5** after preincubation with CCCP, (f) emission image of **2**, (h) emission image of **2** after preincubation with CCCP.

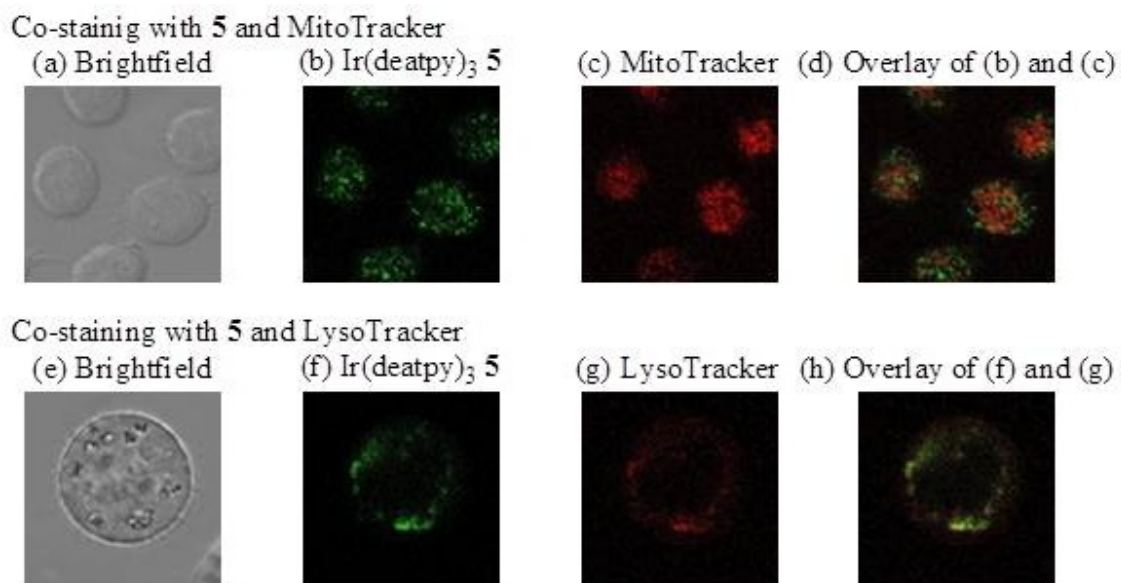

**Figure S14.** Confocal microscope images (Leica TCS SP2, Leica) of HeLa-S3 cells ( $\times 63$ ) co-stained with **5** (10  $\mu\text{M}$ ) and MitoTracker (10 nM) or LysoTracker (100 nM) in MEM/DMSO (99/1, v/v) at 37  $^{\circ}\text{C}$  for 30 min. (a) and (e) brightfield images of HeLa-S3, (b) and (f) emission images of **5**, (c) emission images of MitoTracker, (g) emission images of LysoTracker, (d) overlay of (b) and (c), and (h) overlay of (f) and (g). Excitation at 350 nm and 360 nm for **5** and excitation at 568 nm for MitoTracker and LysoTracker.

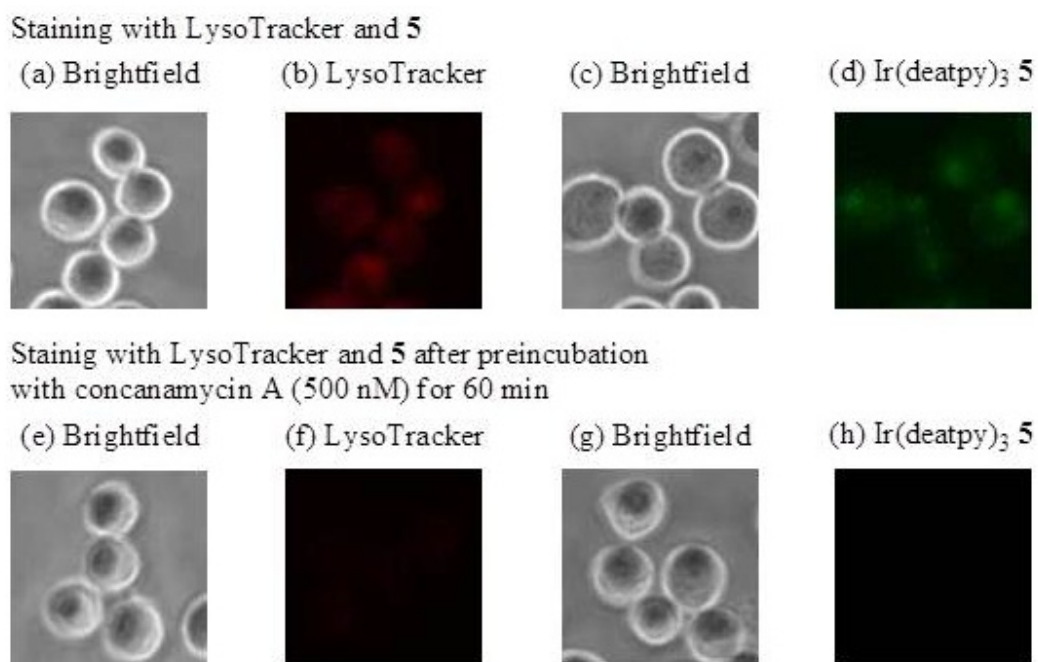

**Figure S15.** Fluorescence microscope images of HeLa-S3 cells ( $\times 40$ ) incubated with LysoTracker (100 nM) and **5** (10  $\mu$ M) in MEM/DMSO (99/1, v/v) at 37  $^{\circ}$ C for 30 min after preincubation with concanamycin A (500 nM) at 37  $^{\circ}$ C for 60 min, excitation at 377 nm for **5** and 540 nm for LysoTracker. (a), (c), (e), and (g) brightfield image of HeLa-S3, (b) emission image of LysoTracker, (d) emission image of **5**, (f) emission image of LysoTracker after preincubation with concanamycin A, (h) emission image of **5** after preincubation with concanamycin A.



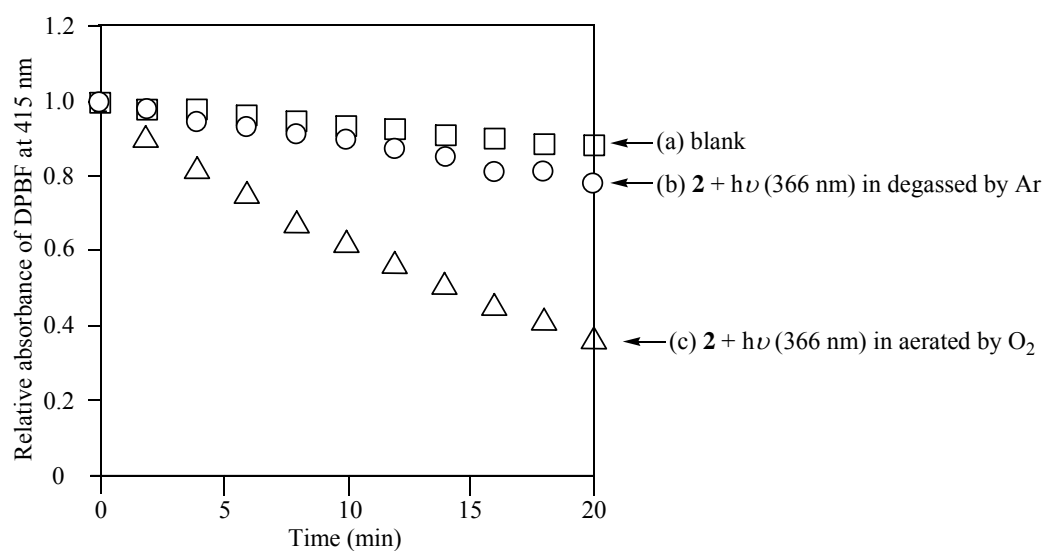

**Figure S16.** Comparative photooxidation of 1,3-diphenylisobenzofuran (DPBF) (50  $\mu\text{M}$ ) in DMSO/H<sub>2</sub>O (3/2), (a) blank in DMSO/H<sub>2</sub>O (3/2) (open squares), (b) **2** (10  $\mu\text{M}$ ) in DMSO/H<sub>2</sub>O (3/2) in degassed by Ar (open circles), (c) **2** (10  $\mu\text{M}$ ) in DMSO/H<sub>2</sub>O (3/2) in degassed by O<sub>2</sub> (open triangles). Excitation at 366 nm for **2**.

**Table S3.** Induction of cell membrane swelling upon photoirradiation in the presence of Ir complexes

| Entry | Ir complex ( $\mu\text{M}$ )       | Solvent         | Conditions <sup>a</sup> | microscopy (filter) <sup>b</sup> | result <sup>c</sup> |
|-------|------------------------------------|-----------------|-------------------------|----------------------------------|---------------------|
| 1     | blank                              | MEM/DMSO (99/1) | 30 min, 37°C            | BIOREVO (FF01)                   | -                   |
| 2     | <b>2</b> (10 $\mu\text{M}$ )       | MEM/DMSO (99/1) | 30 min, 37°C            | BIOREVO (FF01)                   | +                   |
| 3     | <b>4</b> (10 $\mu\text{M}$ )       | MEM/DMSO (99/1) | 60 min, 37°C            | BIOREVO (FF01)                   | -                   |
| 4     | <b>5</b> (10 $\mu\text{M}$ )       | MEM/DMSO (99/1) | 30 min, 37°C            | BIOREVO (FF01)                   | +                   |
| 5     | blank                              | MEM/DMSO (99/1) | 30 min, 37°C            | BIOREVO (GFP-BP)                 | -                   |
| 6     | <b>2</b> (10 $\mu\text{M}$ )       | MEM/DMSO (99/1) | 30 min, 37°C            | BIOREVO (GFP-BP)                 | +                   |
| 7     | <b>5</b> (10 $\mu\text{M}$ )       | MEM/DMSO (99/1) | 30 min, 37°C            | BIOREVO (GFP-BP)                 | +                   |
| 8     | methylene blue (10 $\mu\text{M}$ ) | MEM/DMSO (99/1) | 30 min, 37°C            | BIOREVO (Cy5)                    | +                   |

(a) Conditions show excitation time and incubation temperature. (b) FF01 filter : Ex = 377/50 nm, Em = 520/35 nm. GFP-BP filter : Ex = 470/40 nm, Em = 535/50 nm. Cy5 filter : Ex = 620/60 nm, Em = 700/75 nm. (c) + : cell membrane swelling was observed. - : cell membrane swelling was not observed.
